# Supplementary material
Source: Research Square preprint supplement (doi:10.21203/rs.3.rs-8681490/v1)
Supplement: Supplementary file 2 [file b9da0bcbf9e989719a64a6c1.docx]

## Table 1. Baseline characteristics of sepsis patients stratified by MODS

| **Characteristic** | **No MODS**  N = 18,0871 | **MODS**  N = 4,9311 | **p-value**2 |
| --- | --- | --- | --- |
| **ICU Hours** | 72 (42, 139) | 92 (50, 192) | **<0.001** |
| **Age, years** | 66 (55, 77) | 68 (57, 79) | **<0.001** |
| **Sex, male** |  |  | **<0.001** |
| **Female** | 7,368 (41%) | 2,220 (45%) |  |
| **Male** | 10,719 (59%) | 2,711 (55%) |  |
| **Weight, kg** | 79 (66, 94) | 77 (64, 92) | **<0.001** |
| **Diabetes** |  |  | 0.13 |
| No | 12,241 (68%) | 3,282 (67%) |  |
| Yes | 5,841 (32%) | 1,649 (33%) |  |
| **Hypertension** |  |  | **<0.001** |
| No | 9,086 (50%) | 2,779 (56%) |  |
| Yes | 8,996 (50%) | 2,152 (44%) |  |
| **CAD** |  |  | **<0.001** |
| No | 11,555 (64%) | 3,533 (72%) |  |
| Yes | 6,527 (36%) | 1,398 (28%) |  |
| **CKD** |  |  | **<0.001** |
| No | 14,587 (81%) | 3,746 (76%) |  |
| Yes | 3,495 (19%) | 1,185 (24%) |  |
| **CHF** |  |  | **<0.001** |
| No | 13,212 (73%) | 3,343 (68%) |  |
| Yes | 4,870 (27%) | 1,588 (32%) |  |
| **COPD** |  |  | **<0.001** |
| No | 16,733 (93%) | 4,433 (90%) |  |
| Yes | 1,349 (7.5%) | 498 (10%) |  |
| **HR, breaths/min** | 84 (75, 95) | 91 (79, 103) | **<0.001** |
| **MAP, mmHg** | 59 (53, 66) | 55 (48, 61) | **<0.001** |
| **RR, breaths/min** | 18.6 (16.5, 21.4) | 21.4 (18.3, 24.9) | **<0.001** |
| **Temperature, °C** | 37.33 (37.00, 37.90) | 37.39 (37.00, 38.11) | **<0.001** |
| **SpO₂, %** | 93.0 (90.0, 95.0) | 92.0 (89.0, 94.0) | **<0.001** |
| **Hematocrit, %** | 30 (25, 34) | 29 (25, 34) | **<0.001** |
| **Hemoglobin, g/dL** | 9.80 (8.30, 11.40) | 9.30 (7.90, 10.90) | **<0.001** |
| **Platelet count, ×10⁹/L** | 163 (114, 227) | 163 (103, 240) | 0.10 |
| **BUN, mg/dL** | 20 (14, 32) | 31 (20, 49) | **<0.001** |
| **Creatinine, mg/dL** | 1.00 (0.80, 1.50) | 1.50 (1.00, 2.30) | **<0.001** |
| **Sodium, mmol/L** | 137.0 (135.0, 140.0) | 136.0 (133.0, 140.0) | **<0.001** |
| **Potassium, mmol/L** | 3.90 (3.60, 4.30) | 3.80 (3.40, 4.20) | **<0.001** |
| **Chloride, mmol/L** | 107 (103, 110) | 106 (102, 111) | 0.12 |
| **Bicarbonate, mmol/L** | 22.0 (19.0, 24.0) | 19.0 (16.0, 22.0) | **<0.001** |
| **pH** | 7.33 (7.27, 7.39) | 7.30 (7.21, 7.37) | **<0.001** |
| **INR** | 1.20 (1.10, 1.40) | 1.40 (1.20, 1.70) | **<0.001** |
| **PTT, s** | 32 (28, 41) | 36 (30, 51) | **<0.001** |
| **Lactate, mmol/L** | 2.10 (1.40, 3.10) | 2.50 (1.60, 4.60) | **<0.001** |
| **SOFA score** | 5.0 (3.0, 7.0) | 7.0 (5.0, 10.0) | **<0.001** |
| **SAPS II** | 37 (29, 45) | 45 (36, 55) | **<0.001** |
| **OASIS** | 33 (28, 38) | 37 (31, 43) | **<0.001** |
| **GCS** | 15.00 (13.00, 15.00) | 15.00 (13.00, 15.00) | **0.020** |
| **Mechanical ventilation** |  |  | **<0.001** |
| No | 1,608 (8.9%) | 519 (11%) |  |
| Yes | 16,479 (91%) | 4,412 (89%) |  |
| **Vasoactive drug** |  |  | **<0.001** |
| No | 17,245 (95%) | 3,560 (72%) |  |
| Yes | 842 (4.7%) | 1,371 (28%) |  |
| **Renal replacement therapy** |  |  | **<0.001** |
| No | 17,486 (97%) | 4,680 (95%) |  |
| Yes | 601 (3.3%) | 251 (5.1%) |  |

* *CAD: coronary artery disease, CKD: chronic kidney disease,CHF: congestive heart failure, COPD: chronic obstructive pulmonary disease,HR: heart rate (beats per minute), MAP: mean arterial pressure,RR: respiratory rate (breaths per minute), BUN:blood urea nitrogen, INR: international normalized ratio, PTT: partial thromboplastin time, SOFA score: sequential organ failure assessment score, SAPS II :simplified acute physiology score II,OASIS :oxford acute severity of illness score,GCS: Glasgow Coma Scale.*
